# Supplementary material
Source: PubMed Central journal article supplement (PMC10926731)
Supplement: media-1.pdf [file media-1.pdf]

# Supplementary Materials for

## Small vs. Large Library Docking for Positive Allosteric Modulators of the calcium

### Sensing Receptor

Fangyu Liu<sup>1,†</sup>, Cheng-Guo Wu<sup>2,†</sup>, Chia-Ling Tu<sup>3</sup>, Isabella Glenn<sup>1</sup>, Justin Meyerowitz<sup>2</sup>, Anat Levit Kaplan<sup>1</sup>, Jiankun Lyu<sup>1,4</sup>, Zhiqiang Cheng<sup>3</sup>, Olga O. Tarkhanova<sup>5</sup>, Yurii S. Moroz<sup>5,6,7</sup>, John J. Irwin<sup>1</sup>, Wenhan Chang<sup>3,\*</sup>, Brian K. Shoichet<sup>1,\*</sup> & Georgios Skiniotis<sup>\*,2,8</sup>.

† Contributed equally.

\* Corresponding authors: [wenhan.chang@ucsf.edu](mailto:wenhan.chang@ucsf.edu), [bshoichet@gmail.com](mailto:bshoichet@gmail.com), [yiorgo@stanford.edu](mailto:yiorgo@stanford.edu)

#### Affiliations:

1. Dept. of Pharmaceutical Chemistry, University of California, San Francisco, San Francisco CA 94143, USA.
2. Department of Molecular and Cellular Physiology, Stanford University School of Medicine, Stanford, CA, USA
3. San Francisco VA Medical Center, Dept. of Medicine, University of California, San Francisco, San Francisco CA 94158, USA.
4. Current address: The Rockefeller University, New York, NY, 10065
5. Chemspace LLC, Kyiv, 02094, Ukraine
6. Taras Shevchenko National University of Kyiv, Kyiv, 01601, Ukraine
7. Enamine Ltd., Kyiv, 02094, Ukraine
8. Department of Structural Biology, Stanford University School of Medicine, Stanford, CA, USA

#### The PDF file includes:

Materials and Methods

Figs. S1 to S8

Tables S1 to S2

References

## 40 **Materials and Methods**

### 41 **In-stock and ultra-large virtual ligand screening**

42 To investigate the effect of small versus large library docking and test the docking prediction of  
43 the positive allosteric modulator (PAM) binding sites in complex with “extended” or “bent” PAMs,  
44 we optimized two docking set ups based on the cryo-EM structures of cinacalcet- or evocalcet-  
45 bound CaSR. CaSR/cinacalcet (PDB: 7M3F) is used for 7TM<sup>A</sup> site, and CaSR/evocalcet (PDB:  
46 7M3G) is used for 7TM<sup>B</sup> site (22). In both sites, the position of Q681 and E837 are manually  
47 adjusted to form stronger hydrogen bonds or salt bridge with the secondary amine in cinacalcet  
48 or evocalcet, and in the 7TM<sup>B</sup> site, lipid tails were added in the docking set up based on the  
49 existing electron density. 7TMs were protonated using Reduce (53) (7TM<sup>B</sup> site) or by Protein  
50 Preparation Wizard in Maestro (7TM<sup>A</sup> site) (2020 release) (54). Energy grids for the different  
51 energy terms of the scoring function were pre-generated--van der Waals term based on the  
52 AMBER force fields using CHEMGRID (33); Poisson–Boltzmann-based electrostatic potentials  
53 using QNIFFT73 (35, 55); context-dependent ligand desolvation was calculated using SOLVMAP  
54 (36). The volume of the low dielectric and the desolvation volume was extended out 0.8 and 0.3  
55 Å in 7TM<sup>A</sup> site and 0.6 and 0.3 Å in 7TM<sup>B</sup> site. The experimentally determined poses of cinacalcet  
56 and evocalcet were used to generate matching spheres, which are later used by the docking  
57 software to fit pre-generated ligands’ conformations into the small molecule binding sites (32).  
58 The resulting docking set-ups were evaluated for its ability to enrich known CaSR ligands over  
59 property-matched decoys. Decoys are theoretical non-binders to the receptor as they are  
60 topologically dissimilar to known ligands but retain similar physical properties. We extracted 10  
61 known PAMs from ChEMBL (<https://www.ebi.ac.uk/chembl/>) including cinacalcet and evocalcet.  
62 Four-hundred and eighty-five decoys were generated by using the DUDE-Z pipeline (56). high  
63 logAUCs of 38.89 and 31.67 were achieved for 7TM<sup>A</sup> site and 7TM<sup>B</sup> site respectively. Moreover,  
64 these docking set-ups offer fidelity in reproducing “extended” and “bent” poses of the known PAMs.  
65 For example, by using the 7TM<sup>A</sup> site set-up, 7 out of 10 PAMs adopt an “extended” conformations,

66 while making sensible interactions with the surrounding key residues. By using the 7TM<sup>A</sup> site set-  
67 up, 7 out of 10 PAMs adopt an “bent” conformations. We also used “extrema” set of 92,552  
68 molecules using the DUDE-Z web server (<http://tldr.docking.org>) to ensure that the set ups do not  
69 enrich extreme physical properties. Both set ups enrich over 90% neutrals or mono-cations  
70 among the top-ranking molecules, which are two charges that have precedents of acting as CaSR  
71 PAMs.

72 2.7 million “lead-like” molecules (molecular weight 300-350 Da and logP  $\leq$  3.5), from ZINC15  
73 database (<http://zinc15.docking.org/>), were docked against both sites using DOCK3.7 (32). In the  
74 docking screen against the 7TM<sup>A</sup> site, each library molecule was sampled in about 3,927  
75 orientations and, on average, 330 conformations. For the 7TM<sup>B</sup> site, each library molecule was  
76 sampled in about 3,612 orientations and, on average, 330 conformations. The best scoring  
77 configuration for each docked molecule was relaxed by rigid-body minimization. The two screens  
78 took 956 and 917 core hours respectively spread over 100 cores, or slightly more than 3 days.  
79 For the 1.2-billion ultra-large library docking, each library from the ZINC22 database (39) was  
80 sampled in about 1,707 orientations and 425 conformations in the 7TM<sup>B</sup> site by using DOCK3.8  
81 (32). Overall, over 681 trillion complexes were sampled and scored, spending 380,016 core hours  
82 spreading over 2,000 cores, or around 7 days.

83

#### 84 **Docking results’ processing**

85 For the in-stock screen against the 7TM<sup>B</sup> site, 5,208 molecules with dock energy  $\leq$  -35 kcal/mol  
86 were filtered for novelty using the ECP4-based Tanimoto coefficient (Tc) against 662 CaSR  
87 ligands in ChEMBL (<https://www.ebi.ac.uk/chembl/>). Molecules with Tc > 0.35 were eliminated.  
88 These molecules are filtered for internal strains with criteria of total strain energy < 8 and  
89 maximum dihedral torsion energy < 3 (37). Moreover, the molecules are further filtered for key  
90 interactions: hydrogen bond with Q681, salt bridge with E837 by interfilter.py based on OpenEye

91 Python Toolkits (<https://docs.eyesopen.com/toolkits/python/quickstart-python/linuxosx.html>).

92 After these three filters, 103 molecules were left for further examination. Upon clustering by an

93 ECP4-based  $T_c$  of 0.5, 79 molecules were visually inspected for pi-pi interactions with W818 and

94 F684. 28 molecules were picked, but only 22 molecules can be sourced from vendors and arrived

95 for *in vitro* testing.

96 For the in-stock screen against the 7TM<sup>A</sup> site, 33,321 molecules with dock energy  $\leq -43$  kcal/mol

97 were filtered against the same three filters, resulting in 2,540 molecules for further examination.

98 The 2,540 molecules were filtered against a vendor filter to assess their persuasibility, resulting

99 in 647 molecules for further examination. The 647 molecules were clustered based on ECP4-

100 based  $T_c$  of 0.5 and result in 413 clusterheads. The clusterheads were visually inspected in a

101 similar manner resulting in 28 candidates ordering for purchasing, and 26 molecules arrived for

102 testing. For the large-scale screen, 1.2 billion molecules were screened, and 1 billion molecules

103 scored in the 7TM<sup>B</sup> site. The strain filter is incorporated as part of the new DOCK3.8 pipeline.

104 2,321,171 molecules with  $\leq -35$  kcal/mol were filtered for key interactions with Q681, E837, W818

105 and F684 and novelty. The interaction filtering script for pi-pi interactions with W818 and F684 is

106 implemented based on LUNA (<https://github.com/keiserlab/LUNA>) (57). After visual inspection,

107 1,002 molecules were left. To reduce the number of candidate molecules for purchasing, these

108 1,002 molecules were re-docked against the 7TM<sup>A</sup> site, and 907 molecules were scored in the

109 7TM<sup>A</sup> site. To the end, the molecules were visually inspected again for their poses against both

110 sites, and the remaining 212 novel and non-strained molecules were clustered by the LUNA

111 1,024-length binary fingerprint of a  $T_c = 0.3$ , resulting in 112 clusterheads. Ultimately, 96

112 molecules were prioritized for purchasing based on a final round of visual inspection. The 96

113 molecules belong to three categories—(1) molecules that have 2 aromatic ends, and they usually

114 adopt “bent” pose in 7TM<sup>B</sup> site and “extended” pose in 7TM<sup>A</sup> site. (2) molecules that have aromatic

115 moiety in the pocket and non-ring structure at the distal end but scores well. (3) interesting or  
116 neutral molecules.

117

### 118 **Synthesis of molecules**

119 The in-stock prioritized molecules were sourced from Enamine, Vitas-M laboratory, Ltd.,  
120 UkrOrgSynthesis Ltd., ChemBridge Corporation and Sigma. Ninety-six molecules prioritized for  
121 purchasing were synthesized by Enamine for a total fulfilment rate of 74%. Compounds were  
122 sourced from the Enamine REAL database ([https://enamine.net/compound-collections/real-](https://enamine.net/compound-collections/real-compounds)  
123 [compounds](https://enamine.net/compound-collections/real-compounds)). The purities of active molecules were at least 90% and typically above 95%. The  
124 detailed chemical synthesis can be found in the Chemical Synthesis and analytical investigations  
125 section.

126

### 127 **Hit Optimization**

128 Potential analogs of the hits were identified through a combination of similarity and substructure  
129 searches of the SmallWorld (<https://sw.docking.org/>) from a 46 billion make-on-demand library.  
130 Potential analogs were docked to the CaSR 7TM<sup>B</sup> binding site using DOCK3.8. As was true in the  
131 primary screen, the resulting docked poses were manually evaluated for specific interactions and  
132 compatibility with the site, and prioritized analogs were acquired and tested experimentally.

133

### 134 **Pharmacokinetics**

135 Pharmacokinetic experiments of **'54149**, cinacalcet and evocalcet were performed by Bienta  
136 Enamine Biology Sciences (Kiev, Ukraine) in accordance with the Study Protocols P092622a,  
137 P050723b and P050723a. Plasma pharmacokinetics of **'54149**, cinacalcet and evocalcet were  
138 measured after a single 3 mg/kg dose, administered subcutaneously (SC) at time points of 5, 15,  
139 30, 60, 120, 240, 360, 480 and 1,440 min. All animals were fasted for 4h before dosing. **'54149**  
140 was formulated in 2-HPbCD – saline (30%:70%, v/v). Cinacalcet and evocalcet were formulated

141 in DMSO – 20% Captisol in saline w/v (10:90, v/v). Testing was done in healthy male CD-1 mice  
142 (9 weeks old) weighing  $32.7 \pm 2.1$  g,  $32.8 \pm 1.9$  g or  $32.9 \pm 2.4$  g in the three studies. For all three  
143 studies, each of the time point treatment group included 3 animals with a control group of one  
144 animal dosed with vehicle. In total, 28 animals were used in each study. Mice were injected IP  
145 with 2,2,2-tribromoethanol at the dose of 150 mg/kg prior to drawing the blood. Blood collection  
146 was performed from the orbital sinus in microtainers containing K3EDTA and tubes with clot  
147 activator. Animals were sacrificed by cervical dislocation after the blood samples collection. Blood  
148 samples were centrifuged for 10 min to obtain plasma (15 min to obtain serum) at 3000 rpm. All  
149 samples were immediately processed, flash-frozen and stored at  $-70^{\circ}\text{C}$  until subsequent analysis.  
150 The concentrations of the test compound below the lower limits of quantitation (LLOQ = 2 ng/ml)  
151 were designated as zero. The pharmacokinetic data analysis was performed using  
152 noncompartmental, bolus injection or extravascular input analysis models in WinNonlin 5.2  
153 (PharSight). Data below LLOQ were presented as missing to improve validity of T1/2 calculations.  
154 For each treatment condition, the final concentration values obtained at each time point were  
155 analyzed for outliers using Grubbs' test with the level of significance set at  $p < 0.05$ .

156  
157 Sample Processing: Plasma samples (40  $\mu\text{l}$ ) were mixed with 200  $\mu\text{l}$  of internal standard solution.  
158 After mixing by pipetting and centrifuging for 4 min at 6,000 rpm, 2  $\mu\text{l}$  of each supernatant was  
159 injected into LC-MS/MS system. Solution of compound Verapamil (200 ng/ml in water-methanol  
160 mixture 1:9, v/v) was used as internal standard for quantification of **'54149** in plasma samples.  
161 Solution of Prometryn (100 ng/ml in water-methanol mixture 1:9, v/v) was used as internal  
162 standard for quantification of cinacalcet in plasma samples. Solution of Imipramine (50 ng/ml in  
163 water-methanol mixture 1:9, v/v) was used as internal standard for quantification of evocalcet in  
164 plasma samples.

165

166 Data Analysis: Peak plasma concentration ( $C_{max}$ ) and time for the peak plasma concentration  
167 ( $T_{max}$ ) were the observed values. The areas under the concentration time curve ( $AUC_{last}$  and  
168  $AUC_{inf}$ ) were calculated by the linear trapezoidal rule. The terminal elimination rate constant,  $k_e$   
169 was determined by regression analysis of the linear terminal portion of the log plasma  
170 concentration-time curve. Mean, SD and %CV was calculated for each analyte.

171

172 Serum Calcium Measurement: Serum Calcium level was determined using commercial kits  
173 according to the manufacturer's instructions. The principle of the method is the ability of calcium  
174 forms a blue-colored complex with Arsenazo III dye at neutral pH, the intensity of which is  
175 proportional to the concentration of calcium. Interference with magnesium is eliminated by the  
176 addition of 8-hydroxyquinoline-5-sulfonic acid. Reproducibility: CV=2.91 %.

177

## 178 **Molecular cloning**

179 Full-length (FL) and the truncated CaSR (residues 20-894), were cloned into a pFastBac1 vector  
180 (for expression in insect cells) or a pcDNA3.1(+) vector (for expression in HEK293S cells), with a  
181 N-terminal haemagglutinin (HA) signal sequence followed by a FLAG tag. To improve the protein  
182 yield of CaSR, the DNA sequence of the C-terminal tail from GABA<sub>B1</sub> or GABA<sub>B2</sub> and an  
183 endoplasmic reticulum retention motif were inserted at the C-terminus of pFastBac1-FLAG-CaSR  
184 (20-894) to generate CaSR-C1 and CaSR-C2 constructs, which have been shown to have  
185 comparable G-protein signaling profiles as the WT CaSR homodimer<sup>16</sup>. The FLAG tag of CaSR-  
186 C1 construct was then replaced by a Twin-Strep-tag  
187 (WSHPQFEKGGGSGGGSGGSAWSHPQFEK). All plasmids used were sequence-verified.

188

## 189 **Bioluminescence Resonance Energy Transfer (BRET) TRUPATH Assay**

190 BRET assays were performed and analyzed similar to previously described methods (38). HEK-  
191 293S cells grown in FreeStyle 293 suspension media (ThermoFisher) were co-transfected with

192 150 ng of pCDNA3.1-CaSR FL, G $\alpha$ i3-RLuc8, G $\beta$ , and G $\gamma$ -GFP2 per 1ml of cells at a density of 1  
193  $\times 10^6$  cells ml $^{-1}$  using a DNA/polyethyleneimine ratio of 1:5, and incubated at 130 rpm., 37 °C. Cells  
194 were harvested 48 h post-transfection, washed in assay buffer (Hank's balanced salt solution with  
195 25 mM HEPES pH 7.5) supplemented with 0.5 mM EGTA, followed by another wash in assay  
196 buffer. The cells were then resuspended in an assay buffer with 5  $\mu$ g ml $^{-1}$  coelenterazine 400a  
197 (GoldBio) and placed in white 96-well plates (136101, Thermo Scientific) in a volume of 60  $\mu$ l per  
198 well. 30  $\mu$ l of ligands prepared at 3-times the final concentrations in assay buffer with 1.5 mM  
199 CaCl $_2$ , 0.1% BSA, and 3% DMSO were added to plated cells (final concentrations of 0.5 mM CaCl $_2$ ,  
200 0.33% BSA, and 1% DMSO). After 5 minutes of incubation, the emission at 410 and 515 nm were  
201 read using a SpectraMax iD5 plate reader with a 1-s integration time per well. The BRET ratios  
202 (GFP2/RLuc8 emission) were calculated and normalized to ligand-free control before further  
203 analysis. The efficacy and potency of the molecules were calculated by fitting the concentrations  
204 of molecules and the BRET ratios to a four-parameter logistic equation in Prism (Graphpad  
205 Software).

206

### 207 **Protein expression and purification**

208 CaSR-C1 and CaSR-C2 were overexpressed in *Spodoptera frugiperda* Sf9 cells using a Bac-to-  
209 Bac baculovirus expression system. Sf9 cells grown to a density of 3  $\times 10^6$  cells ml $^{-1}$  were co-  
210 infected with CaSR-C1 and CaSR-C2 baculoviruses for 48 h at 27°C. Cells were then harvested  
211 and stored at -80°C. Purifications of CaSR in complex with compounds '54159 and '6218  
212 followed a similar protocol. Cell pellets were thawed, resuspended, and lysed by nitrogen  
213 cavitation in the lysis buffer containing 20 mM HEPES pH 7.5, 150 mM NaCl, 10 mM CaCl $_2$ , 10%  
214 glycerol, 10 mM L-Trp, protease inhibitors, benzonase, and 50  $\mu$ M of a specific compound. The  
215 lysates were centrifuged at 1,000g for 10 min to remove nuclei and unlysed cells. The membranes



216 were harvested by centrifugation at 100,000g for 30 min and solubilized in the lysis buffer  
217 supplemented with 1% (w/v) Lauryl Maltose Neopentyl Glycol (LMNG, Anatrace) and 0.2% (w/v)  
218 cholesteryl hemisuccinate (CHS, Anatrace) for 3 h, followed by the centrifugation at 100,000g for  
219 30 min. The supernatant was incubated with Strep-Tactin<sup>®</sup>XT 4Flow<sup>®</sup> resin (IBA) for overnight at  
220 4°C. The resin was then loaded into a gravity column and washed with 10 column volumes of the  
221 washing buffer containing 20 mM HEPES 7.5, 150 mM NaCl, 10 mM CaCl<sub>2</sub>, 5% glycerol, 40 μM  
222 L-Trp, and 50 μM compound, supplemented with 0.01% (w/v) LMNG and 0.002% (w/v) CHS,  
223 followed by a second wash with 10 column volumes of washing buffer with 0.001% (w/v) LMNG  
224 and 0.0002% (w/v) CHS. Proteins were eluted by Strep-Tactin<sup>®</sup>XT elution buffer (IBA)  
225 supplemented with 10 mM CaCl<sub>2</sub>, 40 μM L-Trp, 50 μM compound, 0.00075% (w/v) LMNG,  
226 0.00025% (w/v) GDN (CHS, Anatrace) and 0.00015% (w/v) CHS, and further purified by a  
227 Superose 6 column (Cytiva) using a buffer containing 20 mM HEPES 7.5, 150 mM NaCl, 10 mM  
228 CaCl<sub>2</sub>, 40 μM L-Trp, 50 μM compound and 0.00075% (w/v) LMNG, 0.00025% (w/v) GDN and  
229 0.00015% (w/v) CHS. The peak fractions were pooled and concentrated for cryo-EM studies.

230

### 231 **Cryo-EM data acquisition and data processing**

232 For cryo-EM imaging of the CaSR-'6218 complex, movies were collected using a Titan Krios G2  
233 (Thermo Fisher Scientific) transmission electron microscope equipped with a Gatan K3 direct  
234 detector and a post-column energy filter with a 20 eV slit width. The microscope was operated at  
235 300 kV, with a nominal magnification of 130,000x, resulting in a pixel size of 0.8677 Å. Movies  
236 were automatically recorded in counting mode using SerialEM (58) with a total exposure of 55  
237 electrons·Å<sup>-2</sup> over 60 frames, and the defocus range was set from -0.5 to -1.5 μm. For cryo-EM  
238 imaging of the CaSR-'54159 complex, movies were collected using a Titan Krios G2 transmission  
239 electron microscope equipped with a Falcon 4i Direct Electron Detector and a post-column energy  
240 filter with a 20 eV slit width. The microscope was operated at 300 kV, with a nominal magnification  
241 of 165,000x, resulting in a pixel size of 0.75 Å. Movies were recorded in counting mode using

242 EPU 3.6 (Thermo Fisher Scientific) with a total exposure of 50 electrons·Å<sup>-2</sup> over 50 frames, and  
243 the defocus range was set from -0.5 to -1.5 μm.

244 For a detailed workflow of data processing, please refer to Extended Data Fig. 4. All data  
245 underwent processing using similar strategies using cryoSPARC 3.0 (59) and Relion 3 (60).  
246 Movies were imported into cryoSPARC and subjected to patch motion correction, followed by the  
247 contrast transfer function (CTF) estimation using patch CTF estimation. Micrographs with CTF  
248 estimations worse than 4 Å were excluded, resulting in a total of 11,926 micrographs for the  
249 CaSR-‘6218 complex, and 17,625 micrographs for the CaSR-‘54149 complexes, which were  
250 selected for further processing. Particles were autopicked, extracted from the micrographs, and  
251 subjected to 3-5 rounds of 2D classification. Particles classified into “good” classes were selected  
252 and subjected to iterative rounds of 3D ab initio reconstruction using multiple classes, followed by  
253 3D heterogeneous refinement to remove particles from bad classes. For the early rounds of 3D  
254 classification, particles from “bad” classes were further classified by 2D classification and good  
255 particles were retained for subsequent heterogeneous refinement. The resulting high-quality  
256 particle projections were then imported into Relion, where they were subjected to C2 symmetry  
257 expansion, followed by 2-3 rounds of focused 3D classification (without applying symmetry)  
258 without alignment with a mask covering the two 7TMs of CaSR. Finally, the particles from one of  
259 the two best 3D classes with C1 symmetry were selected and imported to cryoSPARC for CTF  
260 refinement and local nonuniform refinement with a soft mask covering CRD-7TM and ECD-CRD  
261 to obtain high-resolution maps. The focused maps were used to generate composite maps for  
262 refinement.

263

## 264 **Model building and refinement**

265 The initial models of CaSR were built on the structure of the active-state CaSR (PDB ID: 7M3F)  
266 and manually docked into the cryo-EM maps in Chimera (61). The models were then subjected  
267 to iterative rounds of manual refinement in Coot (62) and automatic real-space refinement in

268 Phenix (63). The models for CRD–7TM and ECD-CRD regions were refined using the focused  
269 maps that cover these regions first and then combined for further refinement using the composite  
270 maps. The final models were analyzed and validated using MolProbity (64). The refinement  
271 statistics are shown in Extended Data Table 2. Structure figures were generated using ChimeraX  
272 (65).

273

#### 274 **Animal studies**

275 Pharmacokinetics (PK) studies were performed on 10-weekold male CD1 mice by BIENTA  
276 Enamine Biology Services (Kiev, Ukraine). Briefly, the animals were randomly assigned to  
277 treatment groups for 9 time points (5, 15, 30, 60, 120, 240, 360, 480, and 1440 min) and fasted  
278 for 4 h before dosing with each PAM by subcutaneous (SC) route. At each time point post-injection,  
279 mice were injected IP with 2,2,2-tribromoethanol at the dose of 150 mg/kg prior to blood draws.  
280 All other animal studied were performed on 12-16 weeks old male C57/B6 mice (Jackson  
281 Laboratory; Bar Harbor, Maine, USA), approved by the Institutional Animal Care and Use  
282 Committee of the San Francisco Department of Veteran Affairs Medical Center (Protocol numbers:  
283 2021–005 and 2021–016). For the latter studies, test compounds with specified doses were  
284 injected subcutaneously for 6 different time points (15, 30, 60, 120, 240, and 480 min), followed  
285 by isoflurane overdose before blood collections by cardiac puncture. Sera were prepared by  
286 centrifugation (2000xg) in microtainer (Becton Dickinson, SST 365967) and assayed for PTH  
287 levels by ELISA (Quidel, 60-2305) and total calcium using Alfa Wassermann ACE Axcel Vet  
288 Chemistry Analyzer.

289

#### 290 ***Ex vivo* parathyroid gland culture**

291 Mouse PTGs were isolated from 4-week-old male C57/B6 mice, dissected free of thyroid and  
292 surrounding fibrous tissues, and cultured to assess PTH secretion rate (ng/gland/hr) and Ca<sup>2+</sup> set-

293 point ( $[Ca^{2+}]_e$  needed to suppress 50% of  $PTH_{max}$ ) (66, 67). Briefly, PTGs were incubated  
294 sequentially with a series of DMEM media containing increasing concentrations of PAM at 0.75  
295 mM calcium or containing increasing  $[Ca^{2+}]_e$  with (50 or 500 nM) or without PAM to be tested.  
296 Intact PTH levels in culture media were assessed by ELISA and use to calculate the  $EC_{50}$  or  
297  $Ca^{2+}$  set-points for each PAM.  
298

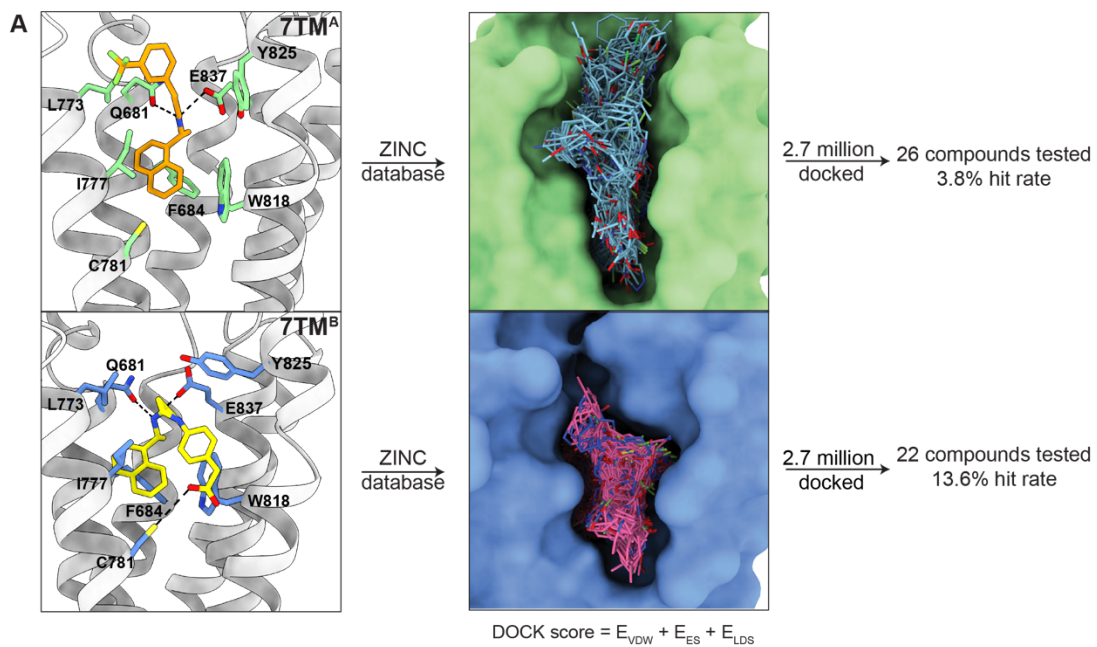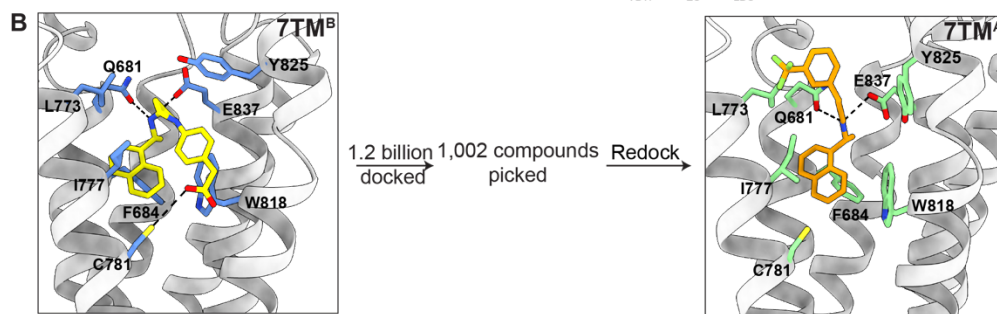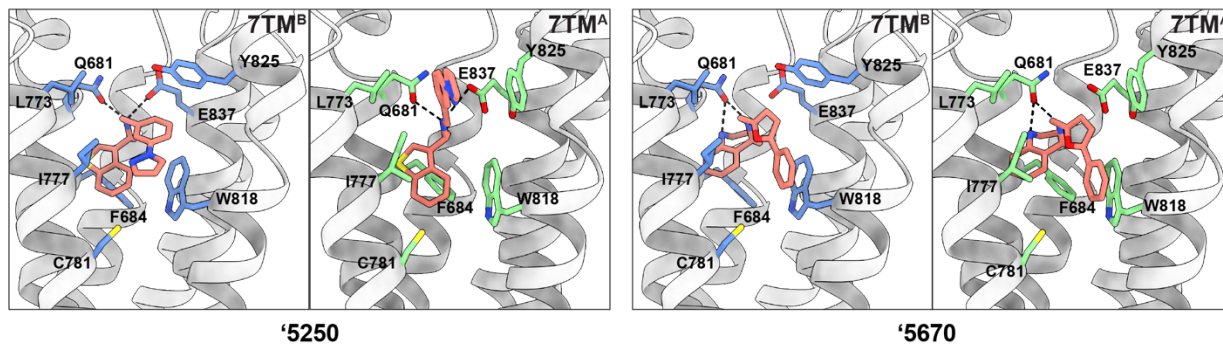

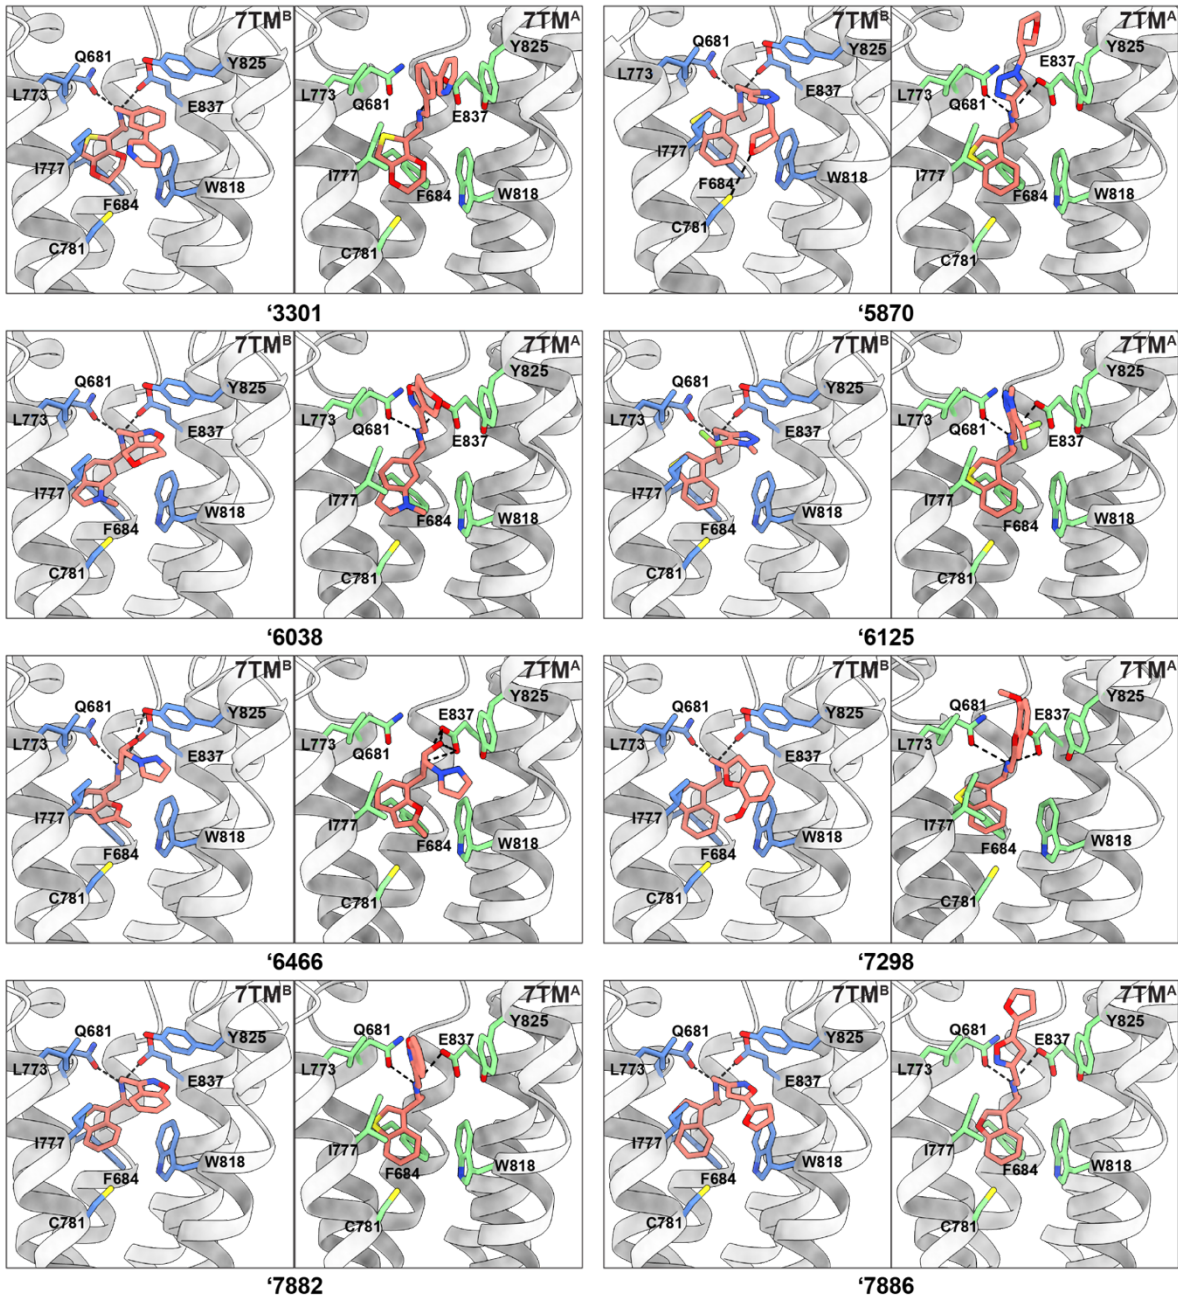

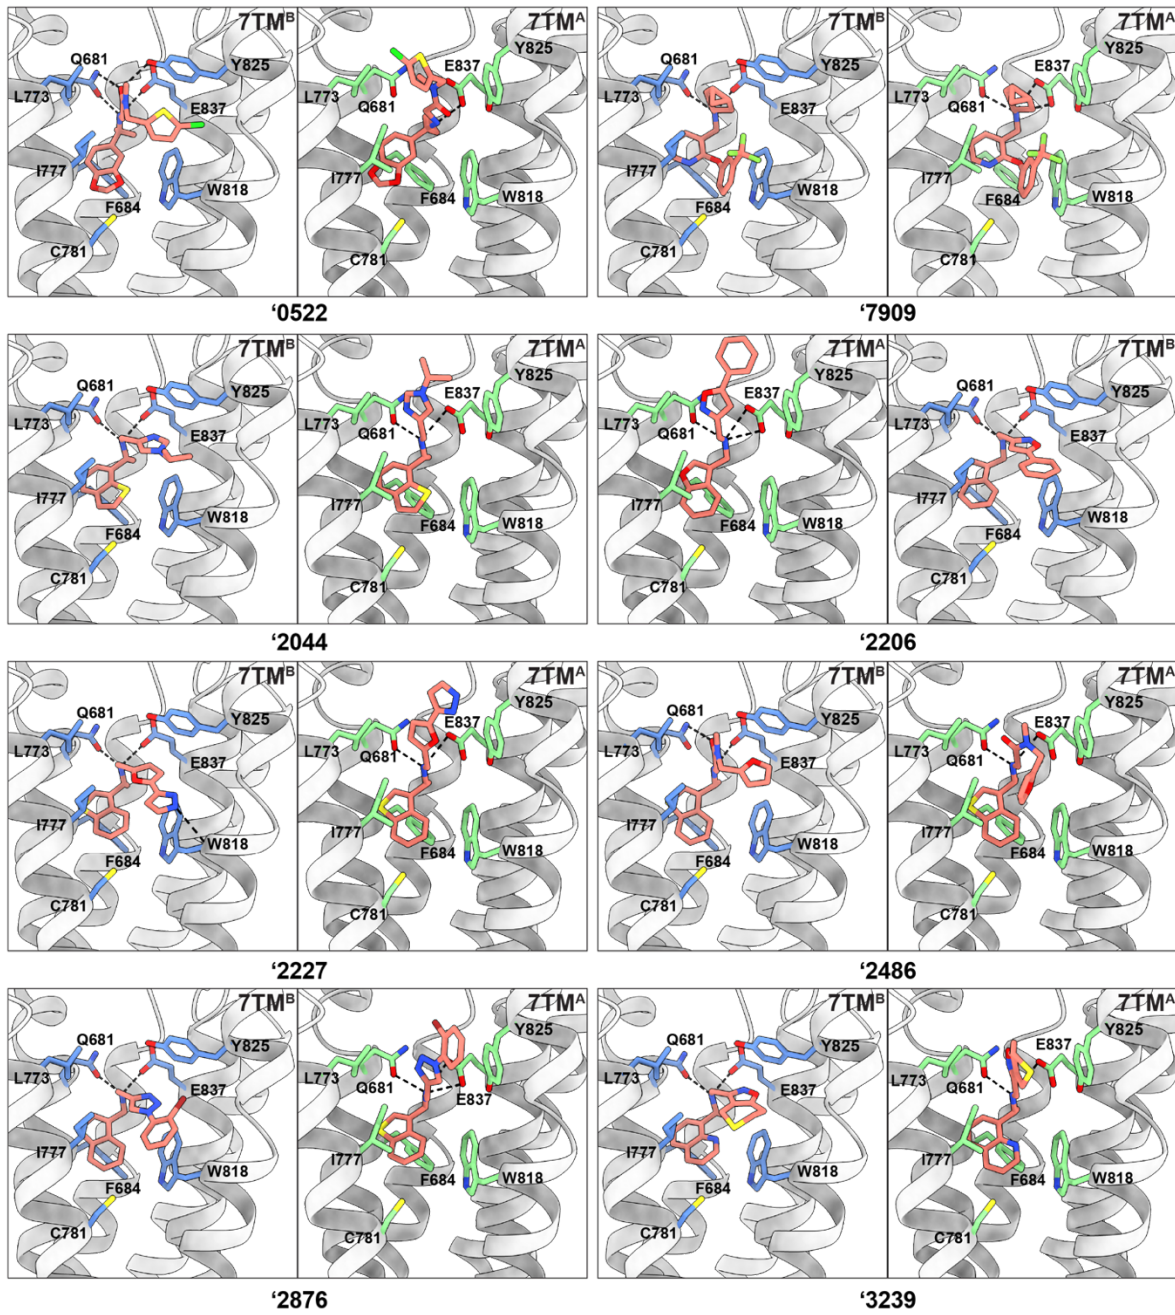

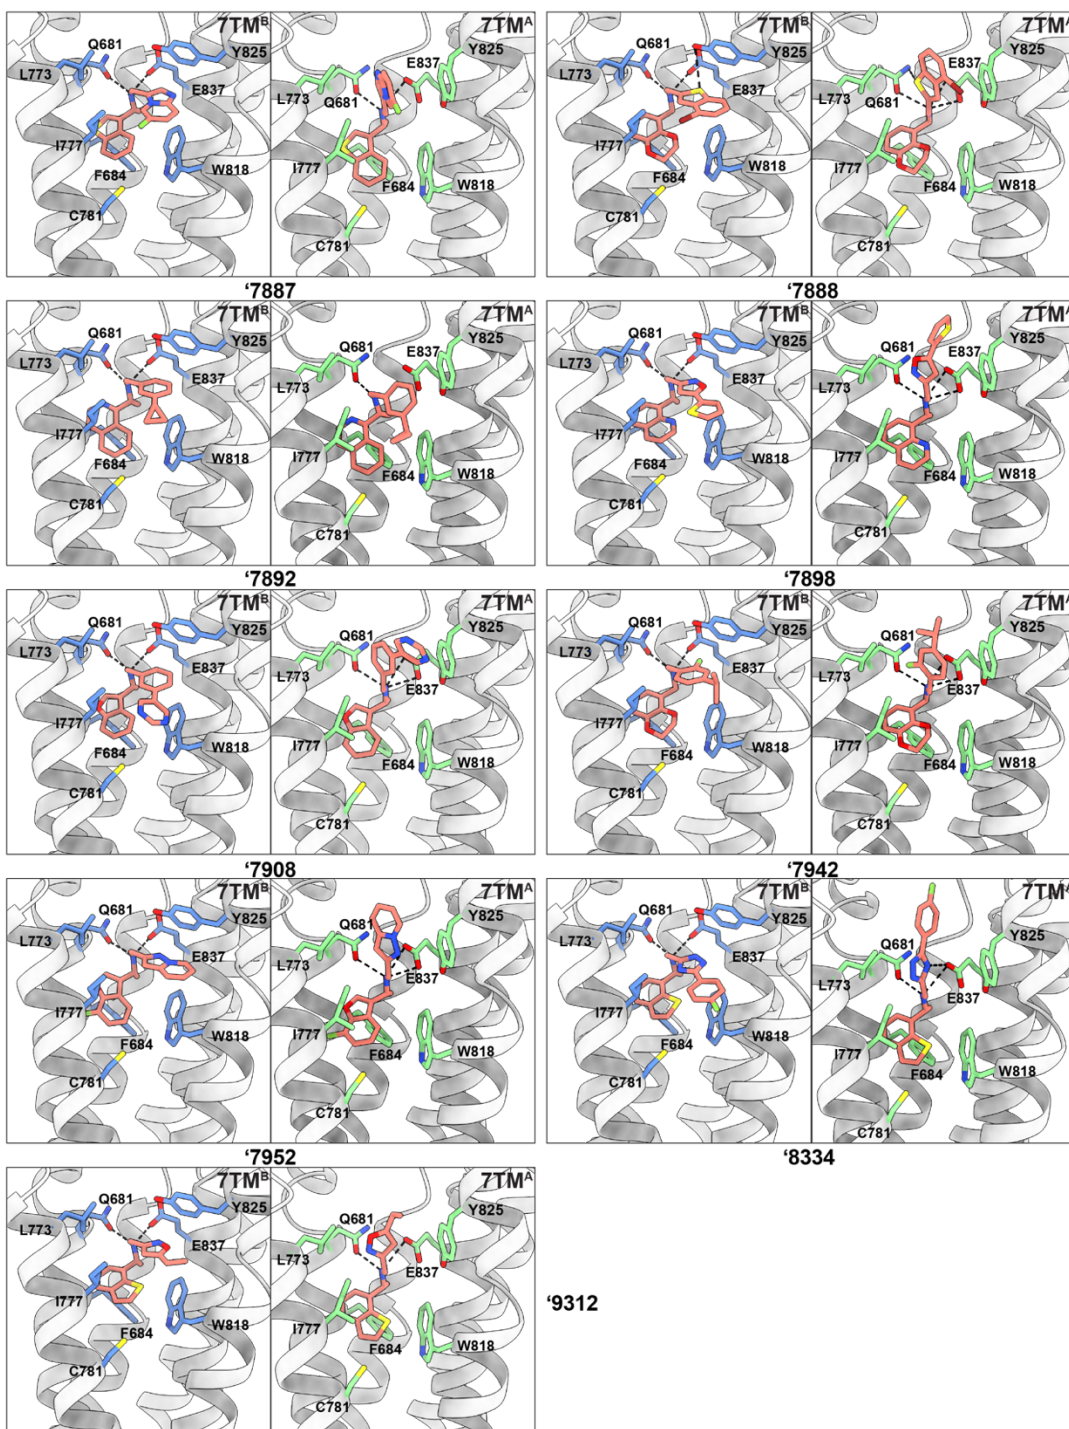

302  
 303 **Fig. S1: Docking workflow and the docked poses of the initial hits from the larger screen.**  
 304 (A) Docking against 7TM<sup>B</sup> outperforms 7TM<sup>A</sup> in terms of higher hit rate when 2.7 million molecules  
 305 were screened (13.6% versus 3.8%). (B) For the 1.2-billion docking, after docking against the  
 306 7TM<sup>B</sup> site, 1002 were picked after inspecting the top-scoring molecules. To reduce the number of  
 307 candidate molecules, the 1,002 molecules were redocked against the 7TM<sup>A</sup> site. The 907 scored  
 308 molecules were inspected again for best interactions with both binding sites, and further clustered  
 309 for purchasing. Docked poses of the initial hits from large-scale docking campaign in 7TM<sup>A</sup> and  
 310 7TM<sup>B</sup> pockets are shown.



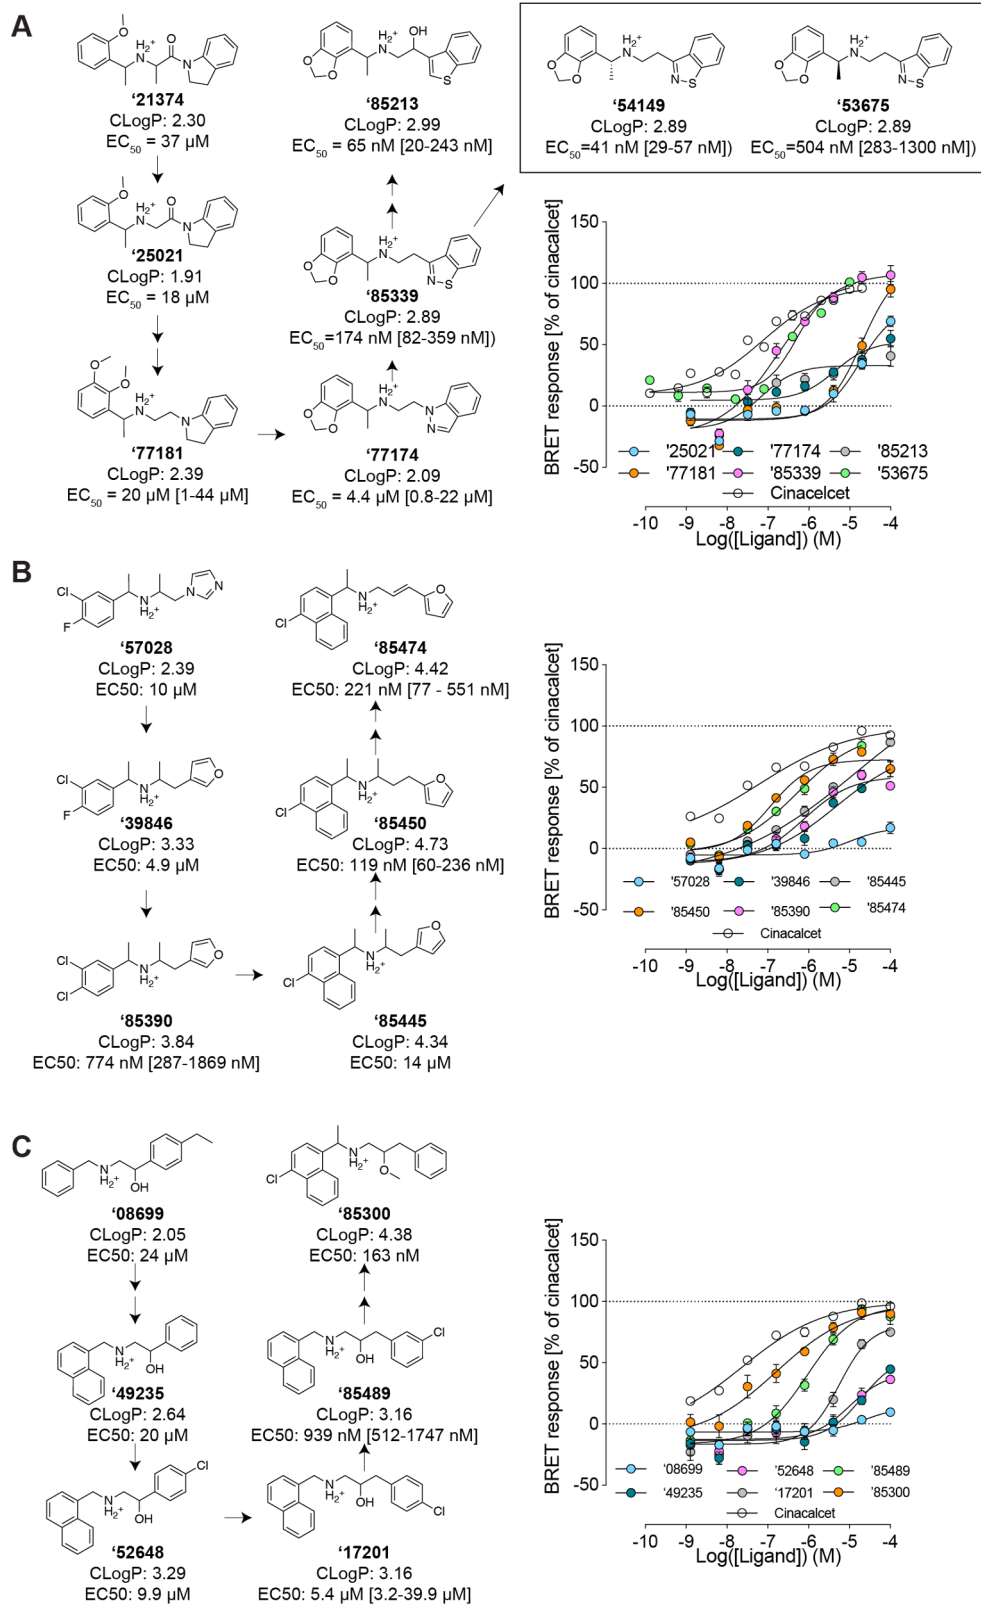

311  
 312 **Fig. S2: Structure activity relationships around the hits from “in-stock” screens. (A)**  
 313 **Additional SAR for optimization of compound ‘21374. (B) SAR for optimization of compound**  
 314 **‘57028. (C) SAR for optimization of compound ‘08699.**

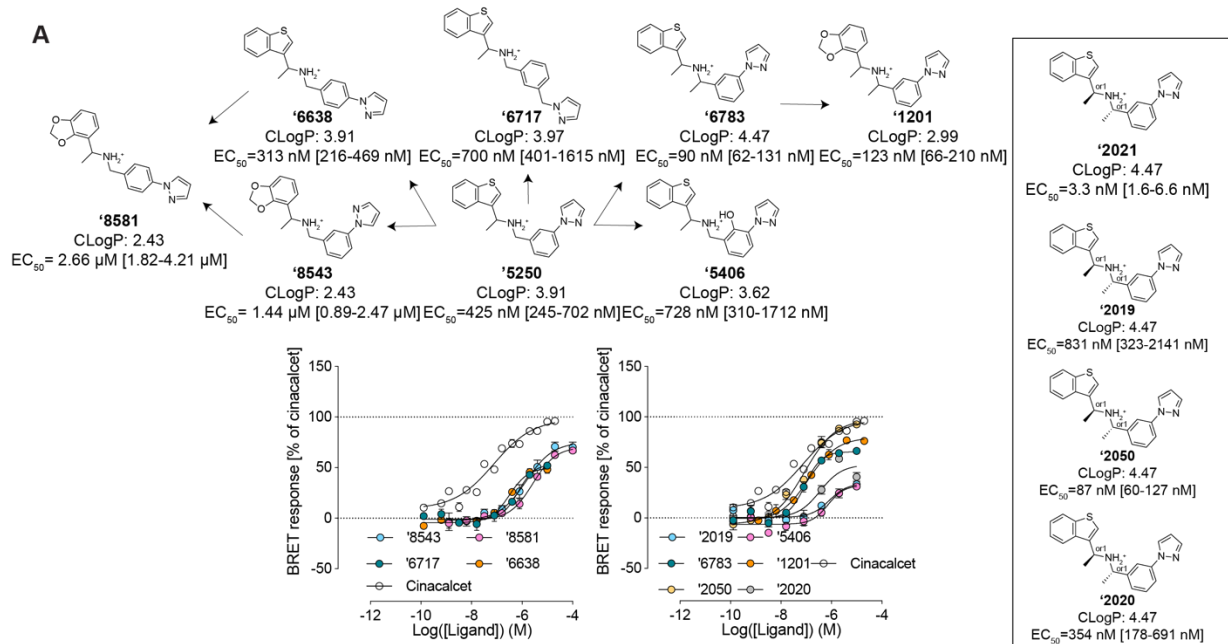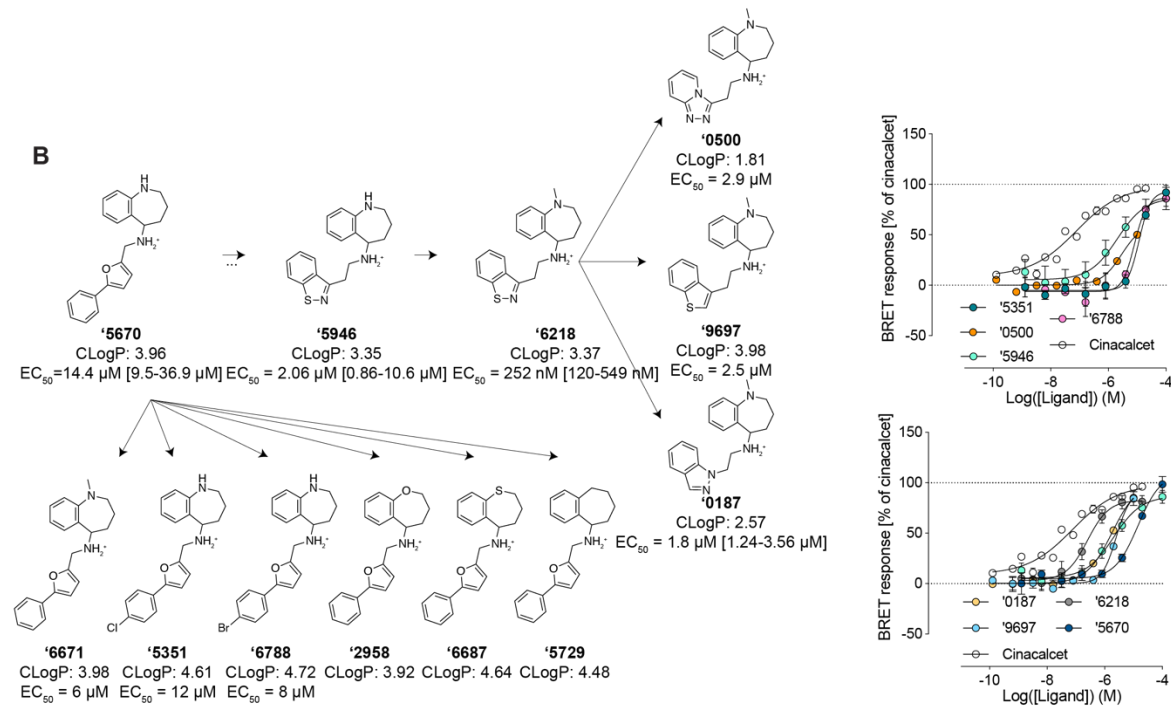

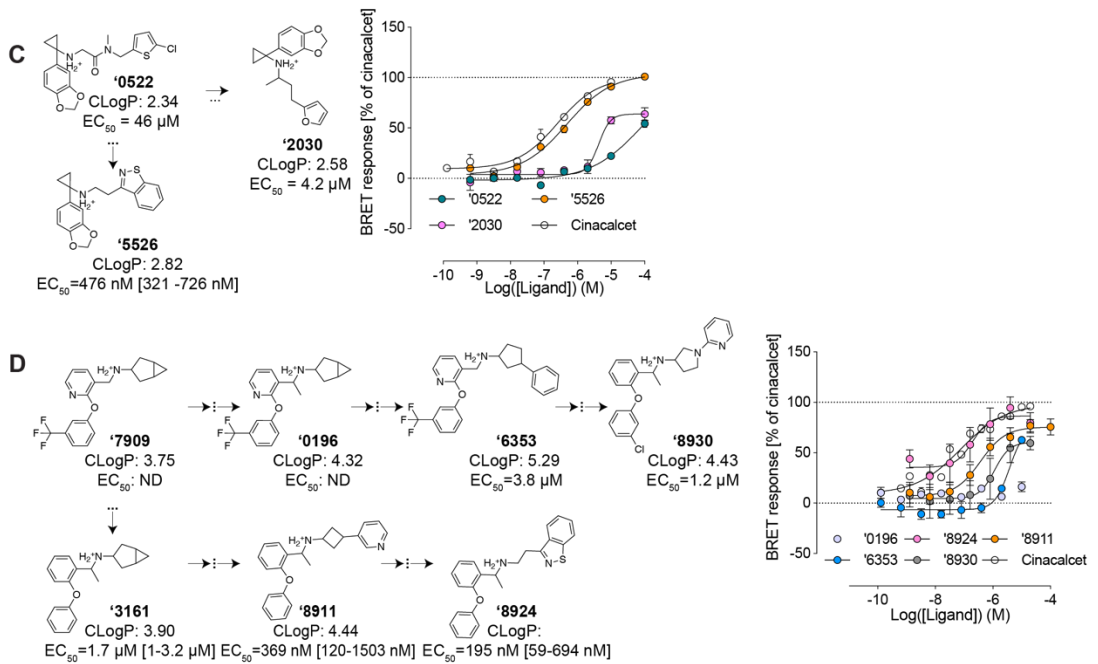

316  
317  
318  
319  
320  
321  
322  
323  
324  
325  
326  
327  
328  
329  
330  
331  
332  
333  
334  
335  
336

**Fig. S3. Additional structure activity relationships around the initial hits from large-scale docking campaign. (A) Additional SAR for optimization of compound '5250. (B) Additional SAR for optimization of compound '5670. (C) SAR for optimization of compound '0522. (D) Additional SAR for optimization of compound '7909.**

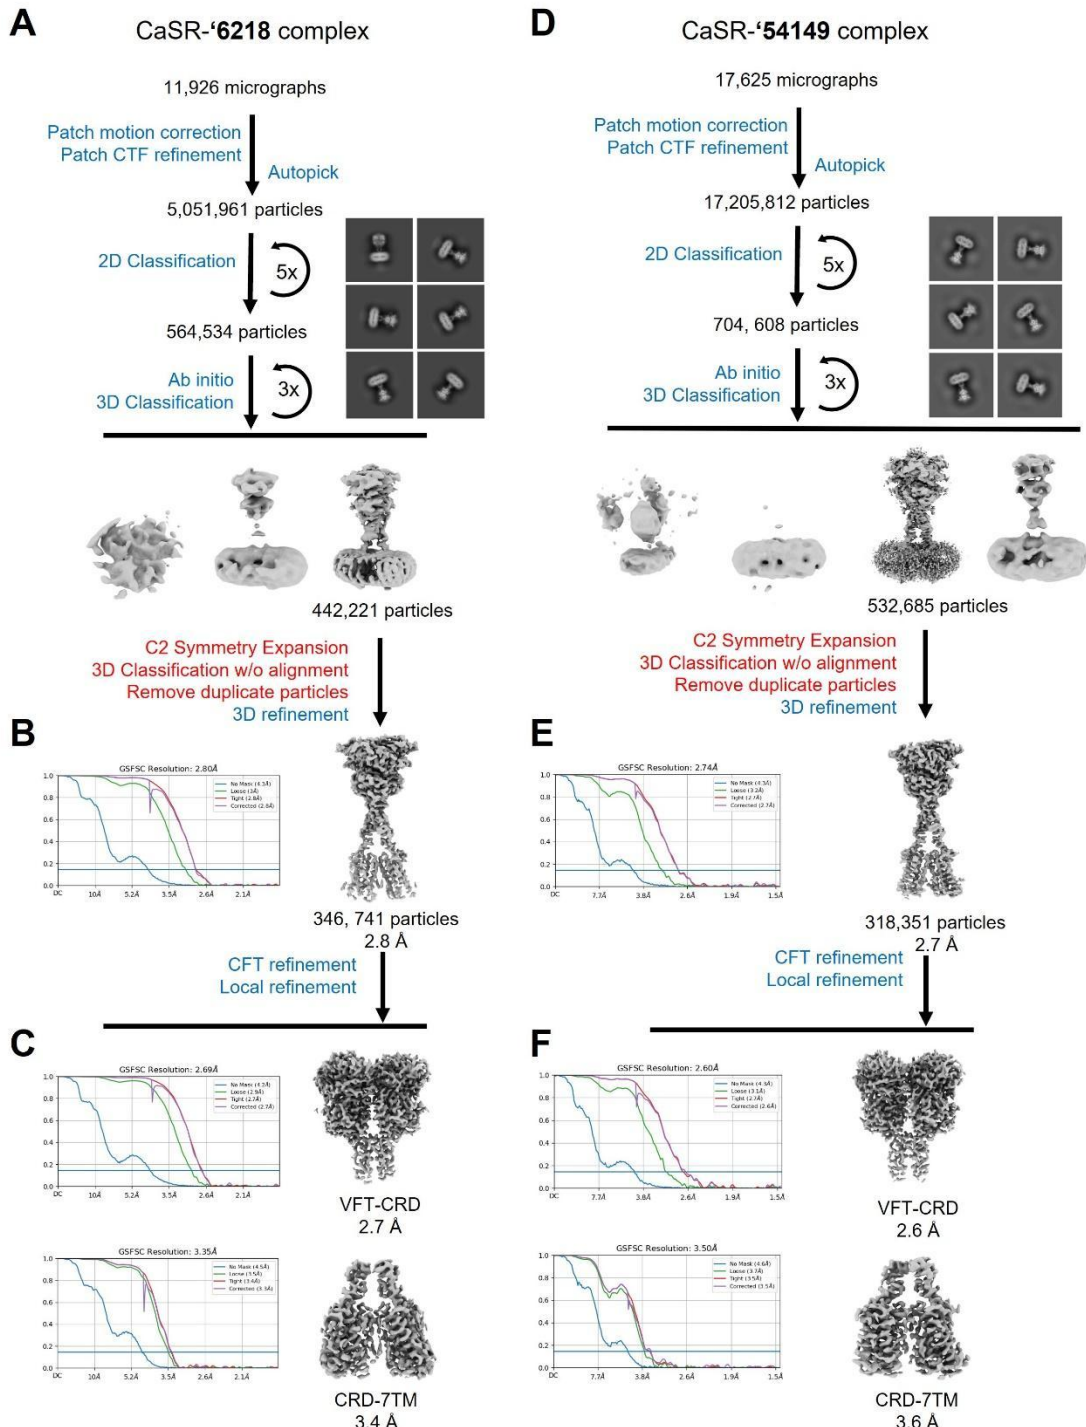

337  
 338 **Fig. S4: Cryo-EM processing workflow and reconstructions of the CaSR-'6218 and CaSR-**  
 339 **'54149 complexes. (A)** Cryo-EM data processing workflow for CaSR-'6218 complex. **(B)** The  
 340 global map and **(C)** local maps of VFT-CRD, and CRD-7TM regions of CaSR-'6218 complex  
 341 with corresponding Fourier shell correlation (FSC) curves indicating nominal resolutions using the  
 342 FSC = 0.143 criterion. **(D)** Cryo-EM data processing workflow for the CaSR-'54149 complex. **(E)**  
 343 The global map and **(F)** local maps of VFT-CRD, and CRD-7TM regions with FSC curves  
 344 indicating nominal resolutions using the FSC = 0.143 criterion. Representative 2D averages are  
 345 shown in square boxes (black) for each complex.

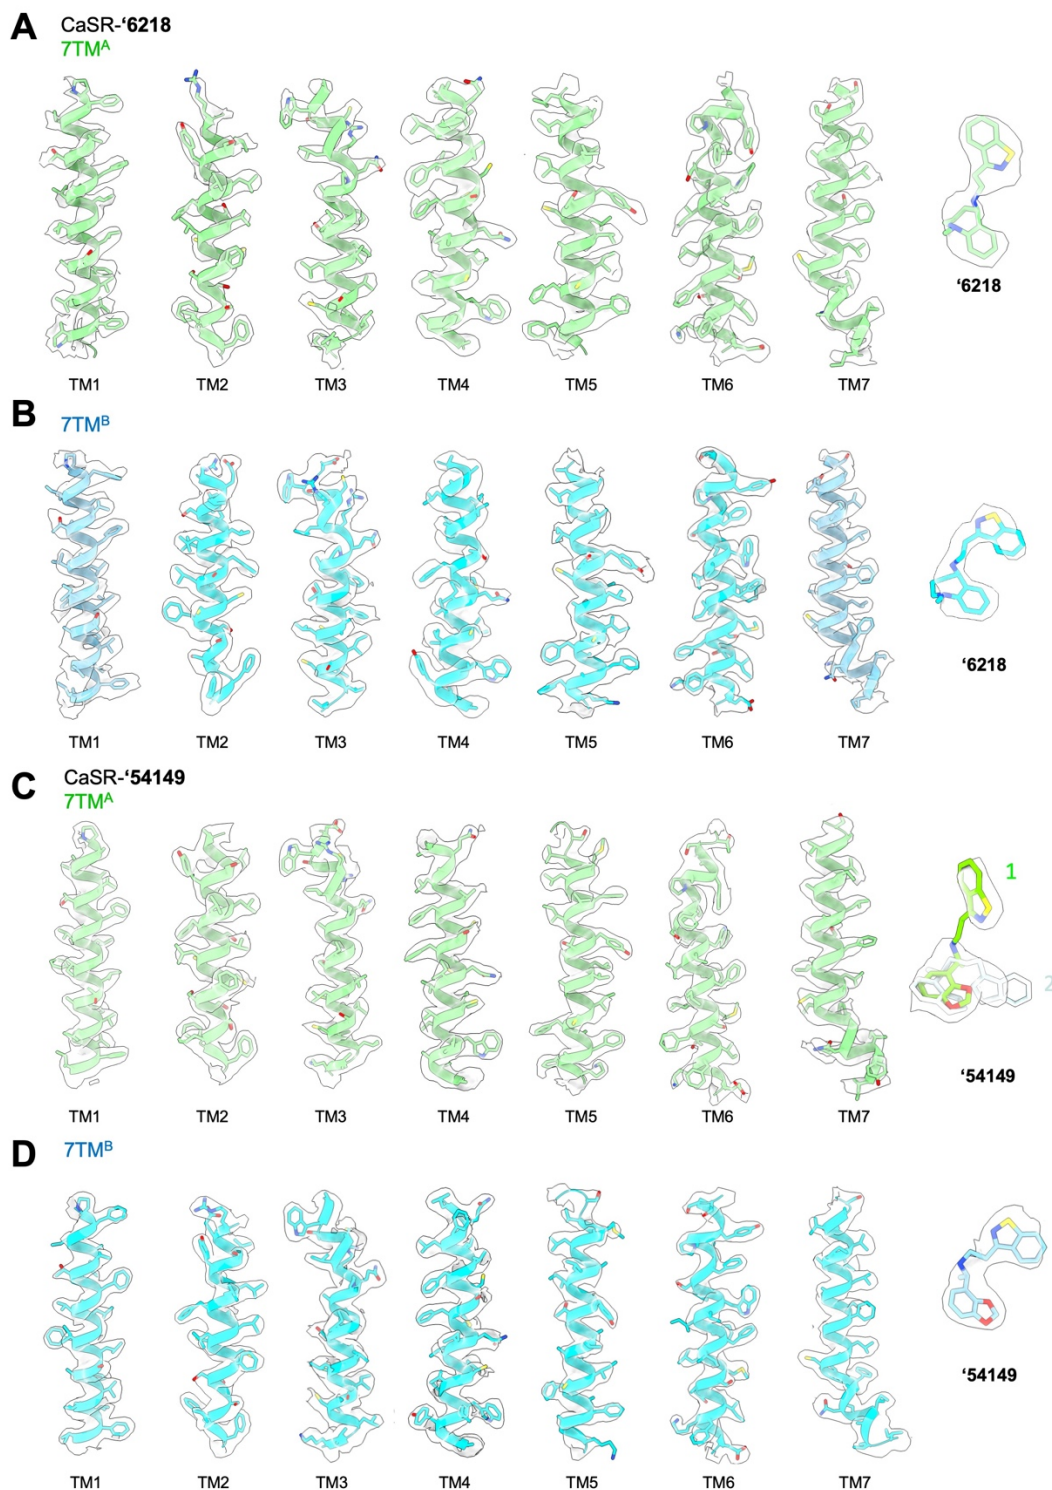

346  
 347 **Fig. S5: Agreement between cryo-EM density and model.** Models and their EM densities for  
 348 the 7TM bundles and compound '6218 in (A) 7TM<sup>A</sup> and (B) 7TM<sup>B</sup> of CaSR-'6218 complex. Models  
 349 and their EM densities for the 7TM bundles and compound '54149 in (C) 7TM<sup>A</sup> and (D) 7TM<sup>B</sup> of  
 350 CaSR-'54149 complex. Models related to the 7TM<sup>A</sup> and 7TM<sup>B</sup> are colored in green and cyan,  
 351 respectively. In (C), straight and folded-over conformations of '54149 fitting into the density are  
 352 shown in bright green and light cyan, respectively.

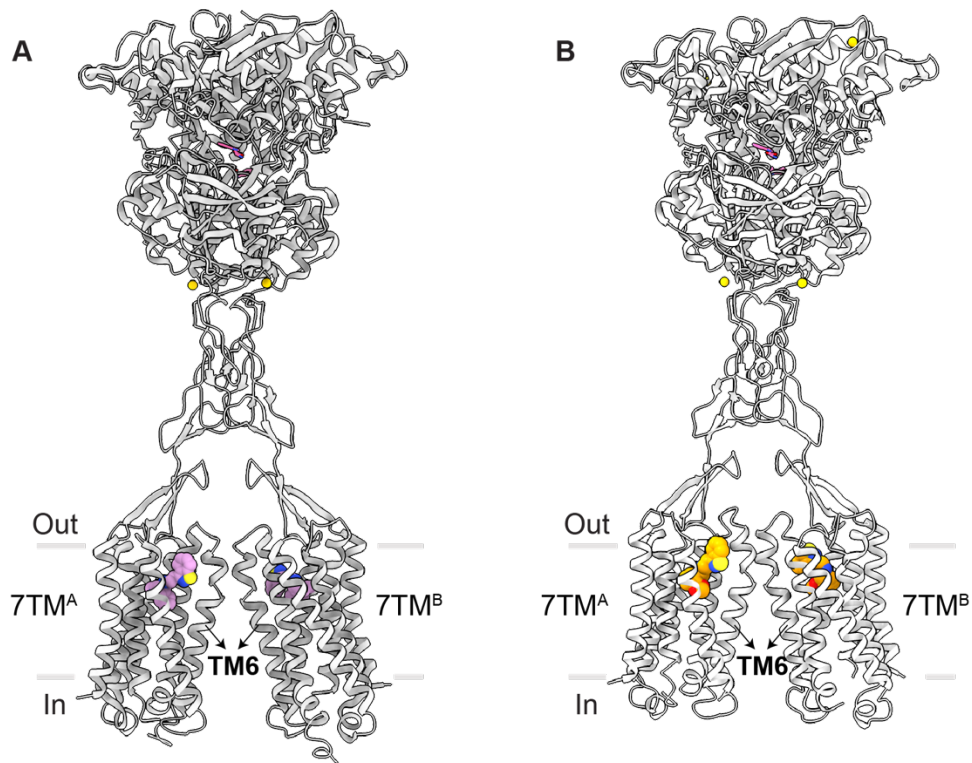

353  
 354  
 355  
 356  
 357  
 358  
 359  
 360  
 361  
 362  
 363  
 364  
 365  
 366  
 367  
 368  
 369  
 370  
 371  
 372  
 373  
 374  
 375  
 376  
 377

**Fig. S6: Asymmetric 7TMs configurations in CaSR complexes.** (A) Overall structure of '6218 bound CaSR. '6218 is in pink spheres. (B) Overall structure of '54149 bound CaSR. '54149 is in orange spheres. A higher sitting position of TM6 of 7TM<sup>A</sup> relative to 7TM<sup>B</sup> indicates an asymmetry arrangement of two 7TMs of CaSR.

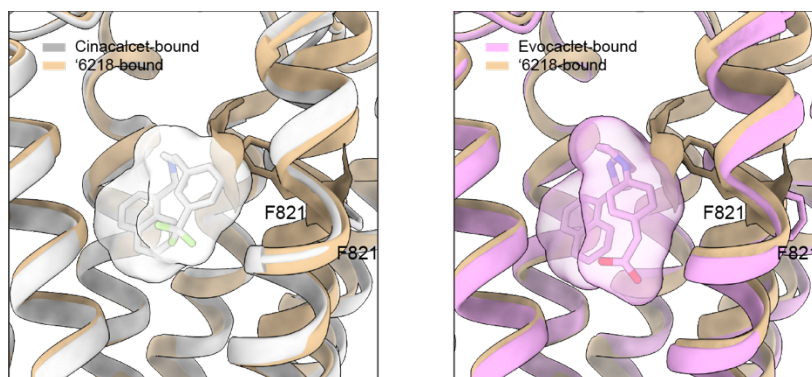

378  
 379 **Fig. S7: Structure comparison between the cinacalcet-bound CaSR or evocalcet-bound**  
 380 **CaSR with '6218-bound CaSR in the 7TM<sup>B</sup> pocket.** Cinacalcet-bound CaSR is in silver, '6218-  
 381 bound CaSR ('6218 is hidden for clarity) is in tan. Evocalcet-bound CaSR is in pink. Residue  
 382 F821's side chain is shown. Evocalcet, cinacalcet and F821 from the '6218 structure are shown  
 383 to demonstrate the clashes between them.

384  
 385  
 386  
 387  
 388  
 389  
 390  
 391  
 392  
 393  
 394  
 395  
 396

**'54149-CaSR 7TM<sup>A</sup>**

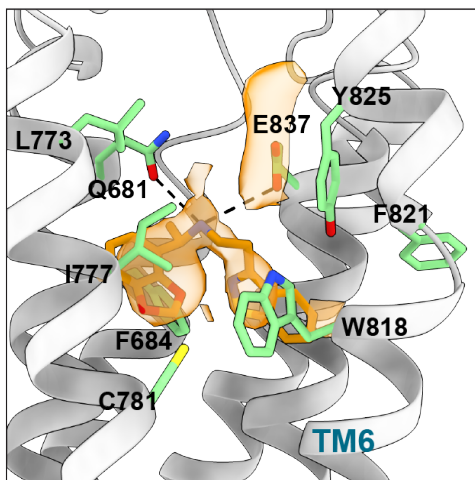

397  
398 **Fig. S8: The “folded-over” pose of ‘54149 bound in the 7TM<sup>A</sup> pocket.** Close-up view of  
399 “folded-over” conformation of ‘54149 in the 7TM<sup>A</sup> site, with EM density in the ligand-binding pocket  
400 shown in orange. Surrounding and key residues involved in the interaction are shown in green  
401 sticks.

402  
403  
404  
405  
406  
407  
408  
409  
410  
411  
412  
413  
414  
415



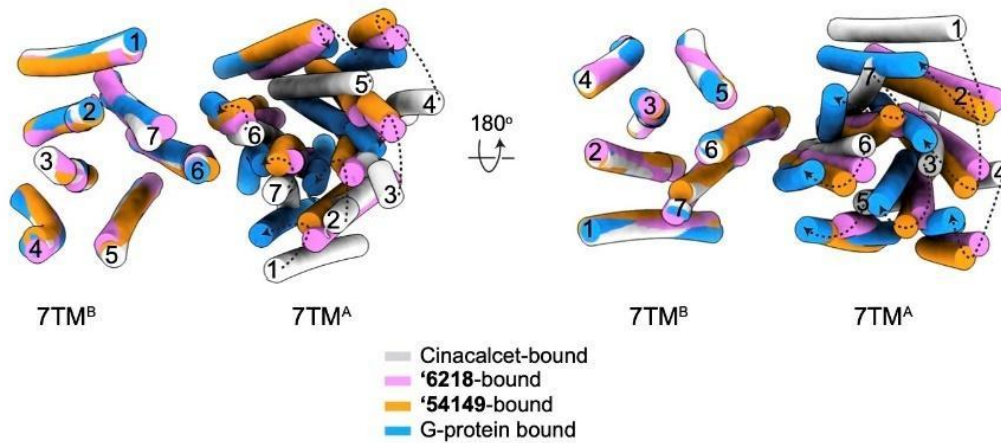

**Fig. S9: Comparison of overall arrangements of 7TMs in CaSR homodimer stabilized by different PAMs to G protein-bound active-state CaSR complex.** Overlay of the 7TMs of cinacalcet (grey, PDB: 7M3F), '6218 (pink) and '54149 (orange)-bound CaSR, and  $G_{i3}$ -bound CaSR (PDB: 8SZH) on the 7TM<sup>B</sup> protomer. Top (left) and bottom (right) views are shown. The differences between the corresponding 7TM bundles in PAM-bound CaSR and  $G_{i3}$ -bound CaSR are indicated by dashed arrows.

439  
440

**Table S1. Potency for hits identified in initial CaSR docking screen and their Tanimoto coefficients (Tc) to known modulators.**

| Compound                                                                                      | Category             | EC50 (μM)                        | Tc <sup>b</sup> | Nearest ChEMBL ligand <sup>c</sup>                                                                     |
|-----------------------------------------------------------------------------------------------|----------------------|----------------------------------|-----------------|--------------------------------------------------------------------------------------------------------|
| 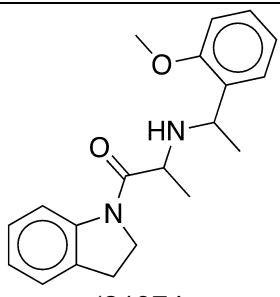<br>'21374   | In-stock initial hit | 37                               | 0.28            | <br>CHEMBL1224424   |
| <br>'74843   | In-stock initial hit | ND                               | 0.32            | <br>CHEMBL451383    |
| <br>'57028  | In-stock initial hit | 10                               | 0.28            | <br>CHEMBL568485    |
| <br>'08699 | In-stock initial hit | 24                               | 0.34            | <br>CHEMBL1224190 |
| <br>'6125  | LSD initial hit      | 7.49<br>[4.82<br>–<br>17.95<br>] | 0.3             | <br>CHEMBL2092942 |
| <br>'2486  | LSD initial hit      | 1.79<br>[1.02<br>–<br>3.93]      | 0.25            | <br>CHEMBL1201284 |

|                                                                                                  |                 |                              |      |                                                                                                           |
|--------------------------------------------------------------------------------------------------|-----------------|------------------------------|------|-----------------------------------------------------------------------------------------------------------|
| 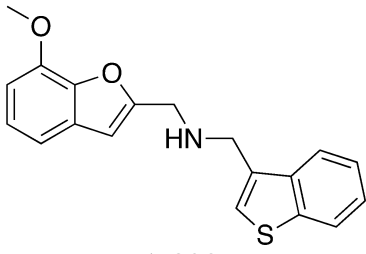 <p>'7298</p>   | LSD initial hit | 1.89<br>[1.19<br>–<br>2.95]  | 0.27 |  <p>CHEMBL200041</p>   |
|  <p>'8334</p>   | LSD initial hit | 2.35<br>[1.21<br>–<br>7.98]  | 0.31 |  <p>CHEMBL2092942</p>  |
|  <p>'6038</p> | LSD initial hit | ND                           | 0.25 |  <p>CHEMBL571048</p> |
|  <p>'0522</p> | LSD initial hit | 46.00<br>[10.7<br>3<br>– ??] | 0.25 |  <p>CHEMBL458515</p> |

|                                                                                                  |                 |                                     |      |                                                                                                            |
|--------------------------------------------------------------------------------------------------|-----------------|-------------------------------------|------|------------------------------------------------------------------------------------------------------------|
| 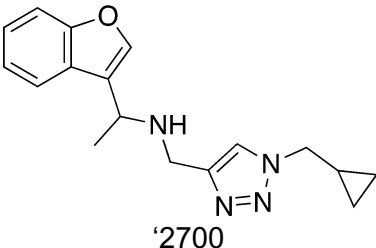 <p>'2700</p>   | LSD initial hit | 3.08<br>[2.08<br>–<br>5.09]         | 0.29 |  <p>CHEMBL2092942</p>   |
|  <p>'7892</p>   | LSD initial hit | 6.34<br>[3.13<br>–<br>30.17<br>]    | 0.35 |  <p>CHEMBL1224190</p>   |
|  <p>'2876</p>  | LSD initial hit | 4.82<br>[3.13<br>–<br>7.98]         | 0.23 |  <p>CHEMBL200041</p>   |
|  <p>'2044</p> | LSD initial hit | 4.41<br>[2.85<br>–<br>9.14]         | 0.33 |  <p>CHEMBL2092942</p> |
|  <p>'7952</p> | LSD initial hit | 0.273<br>[0.18<br>1 –<br>0.413<br>] | 0.35 |  <p>CHEMBL2092942</p> |

|                                                                                                  |                 |                                    |      |                                                                                                            |
|--------------------------------------------------------------------------------------------------|-----------------|------------------------------------|------|------------------------------------------------------------------------------------------------------------|
| 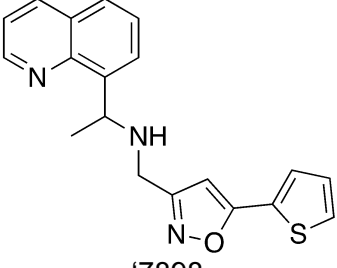 <p>'7898</p>   | LSD initial hit | 5.84<br>[2.94<br>–<br>32.49<br>]   | 0.35 |  <p>CHEMBL2092942</p>   |
|  <p>'6466</p>   | LSD initial hit | ND                                 | 0.26 |  <p>CHEMBL488736</p>    |
|  <p>'3301</p>  | LSD initial hit | 4.83<br>[2.46<br>–<br>65.73<br>]   | 0.28 |  <p>CHEMBL1224190</p> |
|  <p>'5870</p> | LSD initial hit | 0.893<br>[0.66<br>2–<br>1.225<br>] | 0.27 |  <p>CHEMBL566524</p>  |

|                                                                                                  |                 |                                     |      |                                                                                                            |
|--------------------------------------------------------------------------------------------------|-----------------|-------------------------------------|------|------------------------------------------------------------------------------------------------------------|
| 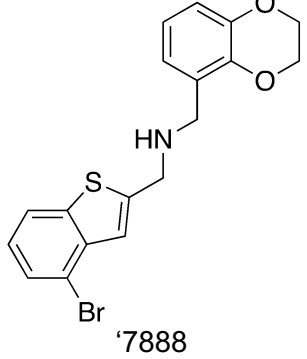 <p>'7888</p>   | LSD initial hit | 2.29<br>[1.86<br>–<br>2.92]         | 0.18 |  <p>CHEMBL200312</p>    |
|  <p>'7886</p>   | LSD initial hit | 0.895<br>[0.46<br>4 –<br>3.265<br>] | 0.34 |  <p>CHEMBL2092942</p>   |
|  <p>'9312</p>  | LSD initial hit | 2.79<br>[1.74<br>–<br>5.01]         | 0.34 |  <p>CHEMBL2092942</p>  |
|  <p>'7908</p> | LSD initial hit | 0.341<br>[0.20<br>7 –<br>0.556<br>] | 0.34 |  <p>CHEMBL2092942</p> |

|                                                                                                  |                 |                                     |      |                                                                                                            |
|--------------------------------------------------------------------------------------------------|-----------------|-------------------------------------|------|------------------------------------------------------------------------------------------------------------|
| 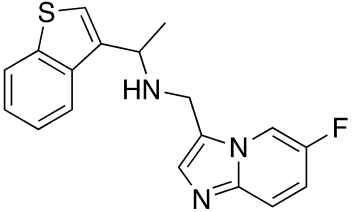 <p>'7887</p>   | LSD initial hit | 1.40<br>[0.69<br>–<br>4.36]         | 0.29 |  <p>CHEMBL566524</p>    |
|  <p>'7942</p>   | LSD initial hit | ND                                  | 0.25 |  <p>CHEMBL1224191</p>   |
|  <p>'7909</p> | LSD initial hit | ND                                  | 0.28 |  <p>CHEMBL1223712</p> |
|  <p>'5250</p> | LSD initial hit | 0.415<br>[0.24<br>5 –<br>0.790<br>] | 0.32 |  <p>CHEMBL1224190</p> |
|  <p>'5670</p> | LSD initial hit | 14.4<br>[9.5 –<br>36.9]             | 0.22 |  <p>CHEMBL254832</p>  |

|                                                                                                 |                 |                                     |      |                                                                                                          |
|-------------------------------------------------------------------------------------------------|-----------------|-------------------------------------|------|----------------------------------------------------------------------------------------------------------|
| 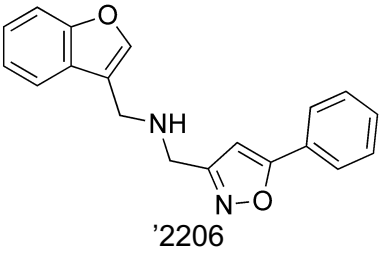 <p>'2206</p>  | LSD initial hit | ND                                  | 0.24 |  <p>CHEMBL572172</p>  |
|  <p>'7882</p>  | LSD initial hit | 1.01<br>[0.61<br>–<br>2.39]         | 0.31 |  <p>CHEMBL566524</p>  |
|  <p>'2227</p> | LSD initial hit | 0.736<br>[0.45<br>2 –<br>1.623<br>] | 0.28 |  <p>CHEMBL566524</p> |

441  
442  
443  
444  
445  
446  
447  
448  
449  
450  
451  
452  
453  
454  
455  
456  
457



458 **Table S2. Cryo-EM data collection, refinement and validation statistics**

|                                            | CaSR-'6218                                     | CaSR-'54149                                    |
|--------------------------------------------|------------------------------------------------|------------------------------------------------|
| <b>Data collection and processing</b>      |                                                |                                                |
| Magnification (kx)                         | 130                                            | 165                                            |
| Voltage (kV)                               | 300                                            | 300                                            |
| Defocus ( $\mu\text{m}$ )                  | -0.5 to -1.5                                   | -0.5 to -1.5                                   |
| Pixel size ( $\text{\AA}$ )                | 0.8677                                         | 0.7500                                         |
| Total dose ( $\text{e}^- / \text{\AA}^2$ ) | 55                                             | 50                                             |
| Symmetry imposed                           | C1                                             | C1                                             |
| Number of micrographs used                 | 11,926                                         | 17,625                                         |
| Number of initial particles picked         | 5,051,961                                      | 1,720,812                                      |
| Number of final particles refined          | 346,741                                        | 318,351                                        |
| Map resolution ( $\text{\AA}$ )            | 2.8 (global)<br>2.7 (VFT-CRD)<br>3.4 (CRD-7TM) | 2.7 (global)<br>2.6 (VFT-CRD)<br>3.6 (CRD-7TM) |
| FSC threshold ( $\text{\AA}$ )             | 0.143                                          | 0.143                                          |
| <b>Refinement</b>                          |                                                |                                                |
| Model composition                          |                                                |                                                |
| Non-hydrogen atoms                         | 12251                                          | 12243                                          |
| Ligand                                     | 18                                             | 18                                             |
| Water                                      | 0                                              | 0                                              |
| RMSD                                       |                                                |                                                |
| bond length ( $\text{\AA}^2$ )             | 0.006                                          | 0.003                                          |
| bond angle ( $^\circ$ )                    | 0.723                                          | 0.520                                          |
| Validation                                 |                                                |                                                |
| MolProbity Score                           | 1.62                                           | 1.47                                           |
| Clash score                                | 5.62                                           | 5.09                                           |
| Ramachandran plot (%)                      |                                                |                                                |
| Favored                                    | 96.07                                          | 96.78                                          |
| Allowed                                    | 3.93                                           | 3.22                                           |
| Disallowed                                 | 0                                              | 0                                              |

459  
460  
461  
462  
463  
464  
465  
466  
467  
468  
469  
470  
471

472 **References:**

- 473 1. E. M. Brown *et al.*, Cloning and characterization of an extracellular Ca(2+)-sensing  
474 receptor from bovine parathyroid. *Nature* **366**, 575-580 (1993).
- 475 2. K. Leach *et al.*, International Union of Basic and Clinical Pharmacology. CVIII. Calcium-  
476 Sensing Receptor Nomenclature, Pharmacology, and Function. *Pharmacol Rev* **72**, 558-  
477 604 (2020).
- 478 3. F. M. Hannan, E. Kallay, W. Chang, M. L. Brandi, R. V. Thakker, The calcium-sensing  
479 receptor in physiology and in calcitropic and noncalcitropic diseases. *Nat Rev Endocrinol*  
480 **15**, 33-51 (2018).
- 481 4. F. M. Hannan, R. V. Thakker, Calcium-sensing receptor (CaSR) mutations and disorders  
482 of calcium, electrolyte and water metabolism. *Best Pract Res Clin Endocrinol Metab* **27**,  
483 359-371 (2013).
- 484 5. M. R. Pollak *et al.*, Autosomal dominant hypocalcaemia caused by a Ca(2+)-sensing  
485 receptor gene mutation. *Nat Genet* **8**, 303-307 (1994).
- 486 6. F. M. Hannan *et al.*, Identification of 70 calcium-sensing receptor mutations in hyper- and  
487 hypo-calcaemic patients: evidence for clustering of extracellular domain mutations at  
488 calcium-binding sites. *Hum Mol Genet* **21**, 2768-2778 (2012).
- 489 7. S. H. Pearce *et al.*, A familial syndrome of hypocalcemia with hypercalciuria due to  
490 mutations in the calcium-sensing receptor. *N Engl J Med* **335**, 1115-1122 (1996).
- 491 8. J. Patel, M. B. Bridgeman, Etelcalcetide (Parsabiv) for Secondary Hyperparathyroidism in  
492 Adults With Chronic Kidney Disease on Hemodialysis. *P T* **43**, 396-399 (2018).
- 493 9. L. Pereira, C. Meng, D. Marques, J. M. Frazao, Old and new calcimimetics for treatment  
494 of secondary hyperparathyroidism: impact on biochemical and relevant clinical outcomes.  
495 *Clin Kidney J* **11**, 80-88 (2018).
- 496 10. T. C. Sauter *et al.*, Calcium Disorders in the Emergency Department: Independent Risk  
497 Factors for Mortality. *PLoS One* **10**, e0132788 (2015).
- 498 11. Z. Zhang, X. Xu, H. Ni, H. Deng, Predictive value of ionized calcium in critically ill patients:  
499 an analysis of a large clinical database MIMIC II. *PLoS One* **9**, e95204 (2014).
- 500 12. M. Egi *et al.*, Ionized calcium concentration and outcome in critical illness. *Crit Care Med*  
501 **39**, 314-321 (2011).
- 502 13. T. Steele, R. Kolamunnage-Dona, C. Downey, C. H. Toh, I. Welters, Assessment and  
503 clinical course of hypocalcemia in critical illness. *Crit Care* **17**, R106 (2013).
- 504 14. A. Husain, R. J. Simpson, Jr., G. Joodi, Serum Calcium and Risk of Sudden Cardiac Arrest  
505 in the General Population. *Mayo Clin Proc* **93**, 392 (2018).
- 506 15. R. Nardone, F. Brigo, E. Trinkka, Acute Symptomatic Seizures Caused by Electrolyte  
507 Disturbances. *J Clin Neurol* **12**, 21-33 (2016).
- 508 16. T. B. Drueke, Cell biology of parathyroid gland hyperplasia in chronic renal failure. *J Am*  
509 *Soc Nephrol* **11**, 1141-1152 (2000).
- 510 17. J. C. Bureo *et al.*, Prevalence of secondary hyperparathyroidism in patients with stage 3  
511 and 4 chronic kidney disease seen in internal medicine. *Endocrinol Nutr* **62**, 300-305  
512 (2015).
- 513 18. A. Levin *et al.*, Prevalence of abnormal serum vitamin D, PTH, calcium, and phosphorus  
514 in patients with chronic kidney disease: results of the study to evaluate early kidney  
515 disease. *Kidney Int* **71**, 31-38 (2007).
- 516 19. D. L. Andress *et al.*, Management of secondary hyperparathyroidism in stages 3 and 4  
517 chronic kidney disease. *Endocr Pract* **14**, 18-27 (2008).
- 518 20. C. P. Kovesdy, Epidemiology of chronic kidney disease: an update 2022. *Kidney Int Suppl*  
519 (2011) **12**, 7-11 (2022).

- 520 21. J. P. Pin, T. Galvez, L. Prezeau, Evolution, structure, and activation mechanism of family  
521 3/C G-protein-coupled receptors. *Pharmacol Ther* **98**, 325-354 (2003).
- 522 22. Y. Gao *et al.*, Asymmetric activation of the calcium-sensing receptor homodimer. *Nature*  
523 **595**, 455-459 (2021).
- 524 23. A. B. Seven *et al.*, G-protein activation by a metabotropic glutamate receptor. *Nature* **595**,  
525 450-454 (2021).
- 526 24. M. M. Papasergi-Scott *et al.*, Structures of metabotropic GABA(B) receptor. *Nature* **584**,  
527 310-314 (2020).
- 528 25. J. Lyu *et al.*, Ultra-large library docking for discovering new chemotypes. *Nature* **566**, 224-  
529 229 (2019).
- 530 26. C. Gorgulla *et al.*, An open-source drug discovery platform enables ultra-large virtual  
531 screens. *Nature* **580**, 663-668 (2020).
- 532 27. R. M. Stein *et al.*, Virtual discovery of melatonin receptor ligands to modulate circadian  
533 rhythms. *Nature* **579**, 609-614 (2020).
- 534 28. A. Alon *et al.*, Structures of the sigma(2) receptor enable docking for bioactive ligand  
535 discovery. *Nature* **600**, 759-764 (2021).
- 536 29. A. A. Sadybekov *et al.*, Synthron-based ligand discovery in virtual libraries of over 11 billion  
537 compounds. *Nature* **601**, 452-459 (2022).
- 538 30. E. A. Fink *et al.*, Structure-based discovery of nonopioid analgesics acting through the  
539 alpha(2A)-adrenergic receptor. *Science* **377**, eabn7065 (2022).
- 540 31. I. Singh *et al.*, Structure-based discovery of conformationally selective inhibitors of the  
541 serotonin transporter. *Cell* **186**, 2160-2175 e2117 (2023).
- 542 32. R. G. Coleman, M. Carchia, T. Sterling, J. J. Irwin, B. K. Shoichet, Ligand pose and  
543 orientational sampling in molecular docking. *PLoS One* **8**, e75992 (2013).
- 544 33. E. C. Meng, B. K. Shoichet, I. D. Kuntz, Automated Docking with Grid-Based Energy  
545 Evaluation. *J Comput Chem* **13**, 505-524 (1992).
- 546 34. K. A. Sharp, R. A. Friedman, V. Misra, J. Hecht, B. Honig, Salt effects on polyelectrolyte-  
547 ligand binding: comparison of Poisson-Boltzmann, and limiting law/counterion binding  
548 models. *Biopolymers* **36**, 245-262 (1995).
- 549 35. K. Gallagher, K. Sharp, Electrostatic contributions to heat capacity changes of DNA-ligand  
550 binding. *Biophys J* **75**, 769-776 (1998).
- 551 36. M. M. Mysinger, B. K. Shoichet, Rapid context-dependent ligand desolvation in molecular  
552 docking. *J Chem Inf Model* **50**, 1561-1573 (2010).
- 553 37. S. Gu, M. S. Smith, Y. Yang, J. J. Irwin, B. K. Shoichet, Ligand Strain Energy in Large  
554 Library Docking. *J Chem Inf Model* **61**, 4331-4341 (2021).
- 555 38. R. H. J. Olsen *et al.*, TRUPATH, an open-source biosensor platform for interrogating the  
556 GPCR transducerome. *Nat Chem Biol* **16**, 841-849 (2020).
- 557 39. B. I. Tingle *et al.*, ZINC-22 horizontal line A Free Multi-Billion-Scale Database of Tangible  
558 Compounds for Ligand Discovery. *J Chem Inf Model* **63**, 1166-1176 (2023).
- 559 40. J. Lyu, J. J. Irwin, B. K. Shoichet, Modeling the expansion of virtual screening libraries.  
560 *Nat Chem Biol* **19**, 712-718 (2023).
- 561 41. K. Leach *et al.*, Towards a structural understanding of allosteric drugs at the human  
562 calcium-sensing receptor. *Cell Res* **26**, 574-592 (2016).
- 563 42. A. N. Keller *et al.*, Identification of Global and Ligand-Specific Calcium Sensing Receptor  
564 Activation Mechanisms. *Mol Pharmacol* **93**, 619-630 (2018).
- 565 43. F. He *et al.*, Allosteric modulation and G-protein selectivity of the Ca<sup>2+</sup>-sensing receptor.  
566 *Nature*, (2024). Feb 7. doi: 10.1038/s41586-024-07055-2. Epub ahead of print. PMID:  
567 38326620.
- 568 44. S. Lin *et al.*, Structures of G(i)-bound metabotropic glutamate receptors mGlu2 and mGlu4.  
569 *Nature* **594**, 583-588 (2021).

- 570 45. E. M. Brown, Clinical lessons from the calcium-sensing receptor. *Nat Clin Pract Endocrinol*  
571 *Metab* **3**, 122-133 (2007).
- 572 46. G. A. Block *et al.*, Effect of Etelcalcetide vs Cinacalcet on Serum Parathyroid Hormone in  
573 Patients Receiving Hemodialysis With Secondary Hyperparathyroidism: A Randomized  
574 Clinical Trial. *JAMA* **317**, 156-164 (2017).
- 575 47. S. A. Jamal, P. D. Miller, Secondary and tertiary hyperparathyroidism. *J Clin Densitom* **16**,  
576 64-68 (2013).
- 577 48. M. Rodriguez, E. Nemeth, D. Martin, The calcium-sensing receptor: a key factor in the  
578 pathogenesis of secondary hyperparathyroidism. *Am J Physiol Renal Physiol* **288**, F253-  
579 264 (2005).
- 580 49. P. P. Centeno *et al.*, Phosphate acts directly on the calcium-sensing receptor to stimulate  
581 parathyroid hormone secretion. *Nat Commun* **10**, 4693 (2019).
- 582 50. J. Gogusev *et al.*, Depressed expression of calcium receptor in parathyroid gland tissue  
583 of patients with hyperparathyroidism. *Kidney Int* **51**, 328-336 (1997).
- 584 51. G. S. Schmidt, T. D. Weaver, T. D. Hoang, M. K. M. Shakir, Severe Symptomatic  
585 Hypocalcemia, complicating cardiac arrhythmia following Cinacalcet (Sensipar(TM))  
586 administration: A Case Report. *Clin Case Rep* **9**, e04876 (2021).
- 587 52. G. A. Block *et al.*, Cinacalcet for secondary hyperparathyroidism in patients receiving  
588 hemodialysis. *N Engl J Med* **350**, 1516-1525 (2004).
- 589 53. J. M. Word, S. C. Lovell, J. S. Richardson, D. C. Richardson, Asparagine and glutamine:  
590 using hydrogen atom contacts in the choice of side-chain amide orientation. *J Mol Biol*  
591 **285**, 1735-1747 (1999).
- 592 54. G. M. Sastry, M. Adzhigirey, T. Day, R. Annabhimoju, W. Sherman, Protein and ligand  
593 preparation: parameters, protocols, and influence on virtual screening enrichments. *J*  
594 *Comput Aided Mol Des* **27**, 221-234 (2013).
- 595 55. K. A. Sharp, Polyelectrolyte Electrostatics - Salt Dependence, Entropic, and Enthalpic  
596 Contributions to Free-Energy in the Nonlinear Poisson-Boltzmann Model. *Biopolymers* **36**,  
597 227-243 (1995).
- 598 56. R. M. Stein *et al.*, Property-Unmatched Decoys in Docking Benchmarks. *J Chem Inf Model*  
599 **61**, 699-714 (2021).
- 600 57. A. V. Fassio *et al.*, Prioritizing Virtual Screening with Interpretable Interaction Fingerprints.  
601 *J Chem Inf Model* **62**, 4300-4318 (2022).
- 602 58. D. N. Mastronarde, Automated electron microscope tomography using robust prediction  
603 of specimen movements. *J Struct Biol* **152**, 36-51 (2005).
- 604 59. A. Punjani, J. L. Rubinstein, D. J. Fleet, M. A. Brubaker, cryoSPARC: algorithms for rapid  
605 unsupervised cryo-EM structure determination. *Nat Methods* **14**, 290-296 (2017).
- 606 60. J. Zivanov *et al.*, New tools for automated high-resolution cryo-EM structure determination  
607 in RELION-3. *Elife* **7**, (2018).
- 608 61. E. F. Pettersen *et al.*, UCSF Chimera--a visualization system for exploratory research and  
609 analysis. *J Comput Chem* **25**, 1605-1612 (2004).
- 610 62. P. Emsley, B. Lohkamp, W. G. Scott, K. Cowtan, Features and development of Coot. *Acta*  
611 *Crystallogr D Biol Crystallogr* **66**, 486-501 (2010).
- 612 63. D. Liebschner *et al.*, Macromolecular structure determination using X-rays, neutrons and  
613 electrons: recent developments in Phenix. *Acta Crystallogr D Struct Biol* **75**, 861-877  
614 (2019).
- 615 64. V. B. Chen *et al.*, MolProbity: all-atom structure validation for macromolecular  
616 crystallography. *Acta Crystallogr D Biol Crystallogr* **66**, 12-21 (2010).
- 617 65. E. F. Pettersen *et al.*, UCSF ChimeraX: Structure visualization for researchers, educators,  
618 and developers. *Protein Sci* **30**, 70-82 (2021).
- 619 66. W. Chang, C. Tu, T. H. Chen, D. Bikle, D. Shoback, The extracellular calcium-sensing  
620 receptor (CaSR) is a critical modulator of skeletal development. *Sci Signal* **1**, ra1 (2008).

621 67. W. Chang *et al.*, PTH hypersecretion triggered by a GABA(B1) and Ca(2+)-sensing  
622 receptor heterocomplex in hyperparathyroidism. *Nat Metab* **2**, 243-255 (2020).
